# Supplementary material
Source: PubMed Central journal article supplement (PMC6531049)
Supplement: NIHMS1022418-supplement-Supplemental.pdf [file NIHMS1022418-supplement-Supplemental.pdf]

## Reporting Summary

Nature Research wishes to improve the reproducibility of the work that we publish. This form provides structure for consistency and transparency in reporting. For further information on Nature Research policies, see [Authors & Referees](#) and the [Editorial Policy Checklist](#).

### Statistical parameters

When statistical analyses are reported, confirm that the following items are present in the relevant location (e.g. figure legend, table legend, main text, or Methods section).

n/a Confirmed

- The exact sample size ( $n$ ) for each experimental group/condition, given as a discrete number and unit of measurement
- An indication of whether measurements were taken from distinct samples or whether the same sample was measured repeatedly
- The statistical test(s) used AND whether they are one- or two-sided  
*Only common tests should be described solely by name; describe more complex techniques in the Methods section.*
- A description of all covariates tested
- A description of any assumptions or corrections, such as tests of normality and adjustment for multiple comparisons
- A full description of the statistics including central tendency (e.g. means) or other basic estimates (e.g. regression coefficient) AND variation (e.g. standard deviation) or associated estimates of uncertainty (e.g. confidence intervals)
- For null hypothesis testing, the test statistic (e.g.  $F$ ,  $t$ ,  $r$ ) with confidence intervals, effect sizes, degrees of freedom and  $P$  value noted  
*Give  $P$  values as exact values whenever suitable.*
- For Bayesian analysis, information on the choice of priors and Markov chain Monte Carlo settings
- For hierarchical and complex designs, identification of the appropriate level for tests and full reporting of outcomes
- Estimates of effect sizes (e.g. Cohen's  $d$ , Pearson's  $r$ ), indicating how they were calculated
- Clearly defined error bars  
*State explicitly what error bars represent (e.g. SD, SE, CI)*

Our web collection on [statistics for biologists](#) may be useful.

### Software and code

Policy information about [availability of computer code](#)

Data collection

N/A

Data analysis

N/A

For manuscripts utilizing custom algorithms or software that are central to the research but not yet described in published literature, software must be made available to editors/reviewers upon request. We strongly encourage code deposition in a community repository (e.g. GitHub). See the Nature Research [guidelines for submitting code & software](#) for further information.

### Data

Policy information about [availability of data](#)

All manuscripts must include a [data availability statement](#). This statement should provide the following information, where applicable:

- Accession codes, unique identifiers, or web links for publicly available datasets
- A list of figures that have associated raw data
- A description of any restrictions on data availability

Some of the data presented in the current study was generated for and shown in previously published reports. Figure 2 B-D was reproduced with permission from Dye et al. 2016 and licensed under CC BY-NC-ND 4.0. The original data can be viewed at <https://doi.10.7554/eLife.05098>. Figure 2 E and Figure 5 B-C, G-J were reproduced with permission from Dye et al. 2015 and licensed under CC BY-NC-ND 4.0. The original data can be viewed at <https://doi.10.7554/eLife.05098>. Figure 2

## Field-specific reporting

Please select the best fit for your research. If you are not sure, read the appropriate sections before making your selection.

Life sciences  Behavioural & social sciences  Ecological, evolutionary & environmental sciences

For a reference copy of the document with all sections, see [nature.com/authors/policies/ReportingSummary-flat.pdf](https://nature.com/authors/policies/ReportingSummary-flat.pdf)

## Life sciences study design

All studies must disclose on these points even when the disclosure is negative.

|                 |                                                                                                                                                                                                                                                                                                                                                                                                                                                     |
|-----------------|-----------------------------------------------------------------------------------------------------------------------------------------------------------------------------------------------------------------------------------------------------------------------------------------------------------------------------------------------------------------------------------------------------------------------------------------------------|
| Sample size     | Three independent directed differentiation experiments were performed; one using H1 stem cells and two using H9 stem cells. Each directed differentiation experiment was performed in a 24 well plate, corresponding to 24 technical replicates per experiment. The purpose of these experiments was to document normal experimental progression and cell morphology to aid recapitulation of the protocol. No statistical analyses were performed. |
| Data exclusions | No data were excluded from these analyses.                                                                                                                                                                                                                                                                                                                                                                                                          |
| Replication     | The experiment was performed in two separate cell lines. The protocol was reproducible in all measured outcomes. Results here were consistent with our previously published work.                                                                                                                                                                                                                                                                   |
| Randomization   | Randomization of subjects is not relevant to this study.                                                                                                                                                                                                                                                                                                                                                                                            |
| Blinding        | Blinding of researchers to data from this study was not relevant to this work. Three separate experiments were performed for the purpose of documenting protocol progression. Results were consistent between these three experiments and with our previously published work.                                                                                                                                                                       |

## Reporting for specific materials, systems and methods

### Materials & experimental systems

| n/a                                 | Involved in the study                                     |
|-------------------------------------|-----------------------------------------------------------|
| <input checked="" type="checkbox"/> | <input type="checkbox"/> Unique biological materials      |
| <input type="checkbox"/>            | <input checked="" type="checkbox"/> Antibodies            |
| <input type="checkbox"/>            | <input checked="" type="checkbox"/> Eukaryotic cell lines |
| <input checked="" type="checkbox"/> | <input type="checkbox"/> Palaeontology                    |
| <input checked="" type="checkbox"/> | <input type="checkbox"/> Animals and other organisms      |
| <input checked="" type="checkbox"/> | <input type="checkbox"/> Human research participants      |

### Methods

| n/a                                 | Involved in the study                           |
|-------------------------------------|-------------------------------------------------|
| <input checked="" type="checkbox"/> | <input type="checkbox"/> ChIP-seq               |
| <input checked="" type="checkbox"/> | <input type="checkbox"/> Flow cytometry         |
| <input checked="" type="checkbox"/> | <input type="checkbox"/> MRI-based neuroimaging |

## Antibodies

Antibodies used

Primary Antibody Source Catalog # Dilution  
(Sections)  
Chicken anti-GFP Abcam Ab13970 1:500  
\*Biotin-Goat anti-TP63 R&D systems BAF1916 1:500  
\*Biotin-Mouse anti MUC5AC Abcam ab79082 1:500  
Goat anti-CC10 (SCGB1A1) Santa Cruz Biotechnology sc-9770 1:200  
Goat anti-Chromogranin A (CHGA) Santa Cruz Biotechnology sc-1488 1:100  
Goat anti-SOX2 Santa Cruz Biotechnology Sc-17320 1:200  
Goat anti-VIMENTIN (VIM) Santa Cruz Biotechnology sc-7558 1:100  
Mouse anti-Acetylated Tubulin (ACTUB) Sigma-Aldrich T7451 1:1000  
Mouse anti-alpha smooth muscle actin (SMA)\*Cy3 conjugated Sigma C6198 1:400  
Mouse anti-E-Cadherin (ECAD) BD Transduction Laboratories 610181 1:500  
Mouse anti-FOXJ1 eBioscience 14-9965-82 1:500  
Mouse anti-Human Nuclear Antigen (HuNu) Abcam ab191181 1:250  
Mouse anti-Surfactant Protein B (SFTPB) Seven Hills Bioreagents Wmab-1B9 1:250  
Rabbit anti-HOPX Santa Cruz Biotechnology Sc-30216 1:250  
Rabbit anti-NKX2.1 Abcam ab76013 1:200  
Rabbit anti-Nuclear Mitotic Apparatus – Human (NuMa) Thermo Scientific PA5-22285 1:500

Rabbit anti-PDGFRalpha Santa Cruz Biotechnology sc-338 1:100  
 Rabbit anti-Pro-Surfactant protein C (Pro-SFTPC) Seven Hills Bioreagents Wrab-9337 1:500  
 Rabbit anti-SOX9 Millipore AB5535 1:500  
 Rabbit anti-Synaptophysin Abcam AB32127 1:500

Secondary Antibody Source Catalog # Dilution  
 Donkey anti-goat 488 Jackson Immuno 705-545-147 1:500  
 Donkey anti-goat 647 Jackson Immuno 705-605-147 1:500  
 Donkey anti-goat Cy3 Jackson Immuno 705-165-147 1:500  
 Donkey anti-mouse 488 Jackson Immuno 715-545-150 1:500  
 Donkey anti-mouse 647 Jackson Immuno 415-605-350 1:500  
 Donkey anti-mouse Cy3 Jackson Immuno 715-165-150 1:500  
 Donkey anti-rabbit 488 Jackson Immuno 711-545-152 1:500  
 Donkey anti-rabbit 647 Jackson Immuno 711-605-152 1:500  
 Donkey anti-rabbit Cy3 Jackson Immuno 711-165-102 1:500  
 Donkey anti-goat 488 Jackson Immuno 705-545-147 1:500  
 Donkey anti-goat 647 Jackson Immuno 705-605-147 1:500  
 Donkey anti-goat Cy3 Jackson Immuno 705-165-147 1:500  
 Donkey anti-mouse 488 Jackson Immuno 715-545-150 1:500  
 Donkey anti-mouse 647 Jackson Immuno 415-605-350 1:500  
 Donkey anti-mouse Cy3 Jackson Immuno 715-165-150 1:500  
 Donkey anti-rabbit 488 Jackson Immuno 711-545-152 1:500  
 Donkey anti-rabbit 647 Jackson Immuno 711-605-152 1:500  
 Donkey anti-rabbit Cy3 Jackson Immuno 711-165-102 1:500  
 Streptavidin 488 Jackson Immuno 016-540-084 1:500

Validation

Antibody validation was performed by the manufacturer.

## Eukaryotic cell lines

Policy information about [cell lines](#)

Cell line source(s)

hESC lines H9 and H1 (NIH registry #0062 and #0043, respectively) were obtained from the WiCell Research Institute.

Authentication

Cell lines are routinely karyotyped to ensure no genetic transformations have occurred.

Mycoplasma contamination

All cell lines tested negative for Mycoplasma contamination.

Commonly misidentified lines  
(See [ICLAC](#) register)

*Name any commonly misidentified cell lines used in the study and provide a rationale for their use.*
